# Supplementary material
Source: Royal Society of Chemistry journal article supplement (https://www.rsc.org/suppdata/cc/1999/1633/903916c.doc)
Supplement: Supplementary file 1 [file 903916c.doc]

# Supporting material

## Synthesis of [Rh(Sulfoxantphos)(-CO)(CO)]2

A solution of 20 mg (0.078 mmol) Rh(acac)(CO)2 and 61 mg (0.078 mmol) Sulfoxantphos in 1.5 ml DMSO was purged with CO/H2 (1:1) for 10 minutes and stirred for 18 hours. The yellow solution was purged for 10 minutes with CO and stirred for another 18 hours. A yellow precipitate was formed when 10 ml of THF was slowly added. The yellow powder was collected by filtration, washed with THF and dried under a gentle stream of CO. The product was stored under a CO atmosphere (yield; 54.3 mg, 74%). 31P{H} NMR (121 MHz, [D6]DMSO, 20C, reference to external H3PO4):  = 2.0 and 8.0 (see text for details). 1H NMR (300 MHz, [D6]DMSO, 20C, TMS):  = 7.86 (br.d, 4H, ArH), 7.34-6.49 (m, 44H, ArH), 1.92 (s, 3H, CH3), 1.40 (s, 3H, CH3). FT-IR (KBr):  = 1968 cm-1 (C=O), 1733 cm-1 (-C=O). FAB(+)MS: *m/z*(%): 1882(1)[M+], 1803(3)[M+-Na-2(CO)], 918(76)[(M+-2(Na))/2].

## Formation of [Rh(Sulfoxantphos)(-CO)(CO)]2 on CPG-240Å

First Sulfoxantphos was impregnated on CPG-240 Å by a literature procedure.[[1]](#endnote-2) One equivalent of Rh(acac)(CO)2 was added to a suspension of Sulfoxantphos/CPG-240Å in diethylether. The suspension was purged with CO/H2 (1:1) for 10 minutes. During this period the solution discoloured and the silica turned yellow. The suspension was stirred for 18 hours and subsequently purged with CO for 10 minutes and stirred for another 18 hours. The SAPC was collected by filtration and partly dissolved in CO-saturated DMSO-d6. 31P NMR experiments showed the clear formation of [Rh(Sulfoxantphos)(-CO)(CO)]2.

### Preparation of Rh(Sulfoxantphos)/SAPC

Rh(Sulfoxantphos)/SAPC precursor was prepared by mixing CPG-240Å to a solution of Rh(acac)(CO)2 and Sulfoxantphos in MeOH on mechanically stirring. The MeOH was removed in vacuo until a free flowing, pink silica remained. A 50 ml stainless steel autoclave was charged with the SAPC and a small amount of water.[[2]](#endnote-3) 10 ml of toluene was added and the catalyst was allowed to incubate for 1 hour at 80C and 30 bar CO/H2 (1:1). The substrate was added pressurising the autoclave to 50 bar CO/H2, and a catalytic run of 24 hours was performed (Table 1).

1. J.P. Arhanchet, M.E. Davis, J.S. Merola, B.E. Hanson, *J. Catal.* **1990**, *121*, 327. [↑](#endnote-ref-2)
2. Watercontent on the SAPCs were 4 weightpercent (thermogravimetically determined). [↑](#endnote-ref-3)
